# Supplementary material for: Impaired glucose homeostasis and a novel HLCS pathogenic variant in holocarboxylase synthetase deficiency: a report of two cases and brief review
Source: publisher site journal article supplement (doi:10.1515/jpem-2020-0106), 2020-08-25
Supplement: Supplementary file 1 [file j_jpem-2020-0106_suppl.docx]

**Supplementary table 1**: The acylcarnitine profiles in our patients.

| Acylcarnitine(µM) | Patient 1 | | Patient 2 | |
| --- | --- | --- | --- | --- |
| Free carnitine | 21.92 | (10.35-48.37) | 6.10 | (8.5-44.77) |
| C2 | 37.19 | (4.96-23.54) | 30.78 | (2.9-28.86) |
| C3 | 14.38 | (<2.8) | 2.73 | (<3.43) |
| C3DC | 0.47 | (<0.11) | 0.52 | (<0.12) |
| C4 | 0.30 | (<0.3) | 0.09 | (<0.25) |
| C5 | 0.19 | (<0.18) | 0.08 | (<0.17) |
| C5DC | 0.09 | (<0.09) | 0.12 | (<0.11) |
| C5OH | 4.33 | (<0.51) | 8.60 | (<0.35) |
| C6 | 0.04 | (<0.06) | 0.02 | (<0.06) |
| C8 | 0.05 | (<0.08) | 0.03 | (<0.08) |
| C8:1 | 0.04 | (<0.26) | 0.04 | (<0.22) |
| C10 | 0.07 | (<0.12) | 0.06 | (<0.12) |
| C10:1 | 0.05 | (<0.11) | 0.03 | (<0.09) |
| C12 | 0.04 | (<0.05) | 0.04 | (<0.06) |
| C12:1 | 0.06 | (<0.05) | 0.03 | (<0.04) |
| C14 | 0.05 | (<0.13) | 0.13 | (<0.14) |
| C14:1 | 0.09 | (<0.07) | 0.08 | (<0.07) |
| C14OH | 0.01 | (<0.02) | 0.02 | (<0.01) |
| C16 | 0.83 | (0.2-1.73) | 1.18 | (0.30-1.84) |
| C16:1 | 0.06 | (<0.08) | 0.10 | (<0.08) |
| C16OH | 0.01 | (<0.02) | 0.02 | (<0.01) |
| C18 | 0.41 | (0.11-1.69) | 0.37 | (0.13-0.62) |
| C18:1 | 1.06 | (0.26-1.73) | 1.88 | (0.41-1.65) |
| C18OH | 0.02 | (<0.02) | 0.03 | (<0.02) |
